# Supplementary material for: Stopping the flood: could we use targeted geoengineering to mitigate sea level rise?
Source: Copernicus journal article supplement (doi:10.5194/tc-12-2955-2018), 2018-09-20
Supplement: Supplementary file 1 [file tc-12-2955-2018-supplement.zip]

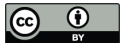

## *Supplement of*

# **Stopping the flood: could we use targeted geoengineering to mitigate sea level rise?**

**Michael J. Wolovick and John C. Moore**

*Correspondence to:* M. J. Wolovick ([wolovick@princeton.edu](mailto:wolovick@princeton.edu))

- [tc-12-2955-2018-supplement-title-page.pdf](#)
- [Animation1\\_TC.mov](#)
- [Animation2\\_TC.mov](#)
- [Animation3\\_TC.mov](#)
- [Animation4\\_TC.mov](#)
- [Animation5\\_TC.mov](#)
- [FjordSillPaper\\_supp\\_v12a.pdf](#)

The copyright of individual parts of the supplement might differ from the CC BY 4.0 License.
